## Review Article

# The role of SUMOylation during development

Ana Talamillo<sup>1</sup>, Orhi Barroso-Gomila<sup>1</sup>, Immacolata Giordano<sup>1</sup>, Leire Ajuria<sup>1</sup>, Marco Grillo<sup>2,3</sup>, Ugo Mayor<sup>4,5</sup> and  Rosa Barrio<sup>1</sup>

<sup>1</sup>CIC bioGUNE, Basque Research and Technology Alliance (BRTA), Derio, Spain; <sup>2</sup>Institut de Génomique Fonctionnelle de Lyon (IGFL), École Normale Supérieure de Lyon, Lyon, France; <sup>3</sup>Centre National de la Recherche Scientifique (CNRS), Paris, France; <sup>4</sup>Department of Biochemistry and Molecular Biology, Faculty of Science and Technology, University of the Basque Country (UPV/EHU), Leioa, Spain; <sup>5</sup>Ikerbasque, Basque Foundation for Science, Bilbao, Bizkaia, Spain

**Correspondence:** Ana Talamillo (atalamillo@cicbiogune.es) or Rosa Barrio (rbarrio@cicbiogune.es)

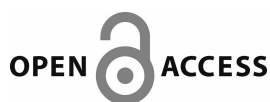

During the development of multicellular organisms, transcriptional regulation plays an important role in the control of cell growth, differentiation and morphogenesis. SUMOylation is a reversible post-translational process involved in transcriptional regulation through the modification of transcription factors and through chromatin remodelling (either modifying chromatin remodelers or acting as a ‘molecular glue’ by promoting recruitment of chromatin regulators). SUMO modification results in changes in the activity, stability, interactions or localization of its substrates, which affects cellular processes such as cell cycle progression, DNA maintenance and repair or nucleocytoplasmic transport. This review focuses on the role of SUMO machinery and the modification of target proteins during embryonic development and organogenesis of animals, from invertebrates to mammals.

## Introduction

SUMO belongs to the Ubiquitin-like modifier (Ubl) family of proteins and attaches covalently to target proteins in a transient and reversible process termed SUMOylation. SUMO proteins are highly conserved in eukaryotes, but the number of paralogues varies among species. A single SUMO gene has been identified in *S. cerevisiae* (*smt3*), *C. elegans* (*smo-1*) and the insect *Drosophila melanogaster* (*smt3*), whereas three SUMO paralogues are found in mammals and eight in plants. There are three SUMO genes in the human genome, SUMO1 to 3. Human SUMO2 and SUMO3 share 97% identity at amino acid level (referred as SUMO2/3), and they share 47% sequence identity with SUMO1. SUMO4 shares 87% identity with SUMO2, and its expression is limited to some tissues [1].

SUMO proteins are synthesized as precursors that need to be matured by SUMO isopeptidases to expose the C-terminal di-glycine motif. The matured SUMO is activated by the heterodimeric E1 enzyme, comprised by SUMO-activating enzyme subunit 1 (SEAI, Aos1) and 2 (SAE2, Uba2). E1 forms a thioester bond between its catalytic cysteine and the SUMO C-terminal glycine. Once activated, SUMO is passed to the catalytic cysteine of the only E2 conjugating enzyme UBC9 (Ubiquitin Conjugating Enzyme E2 I). Finally, SUMO is transferred to the substrate either directly or through a SUMO E3 ligase (Figure 1 and Table 1). The transfer through the E3 ligases ensures a higher conjugation rate and the use of a particular E3 confers substrate specificity. The SUMO E3 ligases best characterized are Protein inhibitor of activated STAT 1 to 4 (PIAS1 to 4) and the Ran-binding protein 2 (RanBP2). Recently, the zinc finger protein ZNF451 was shown to have SUMO E3 ligase activity and to assemble efficiently SUMO2/3 chains (Table 1) [2,3]. The proteases involved in maturation and in the reverse de-conjugation are the ubiquitin-like protein-specific proteases (Ulp) in yeast and invertebrates and sentrin-specific proteases (SENPs) in mammals (SEN1–3 and SEN5–7). Moreover, two additional SUMO isopeptidases have been described in humans, deSUMOylating isopeptidase (DeSI), and the ubiquitin-specific protease-like 1 (USPL1) (Table 1) [4–6].

SUMOylation modulates the function of target proteins by changing their subcellular localization, modifying their DNA-binding or chromatin association ability, recruiting histone-deacetylases and other corepressors or interfering with other post-translational modifications. This review is focused on

Received: 3 January 2020  
 Revised: 24 March 2020  
 Accepted: 25 March 2020

Version of Record published:  
 20 April 2020

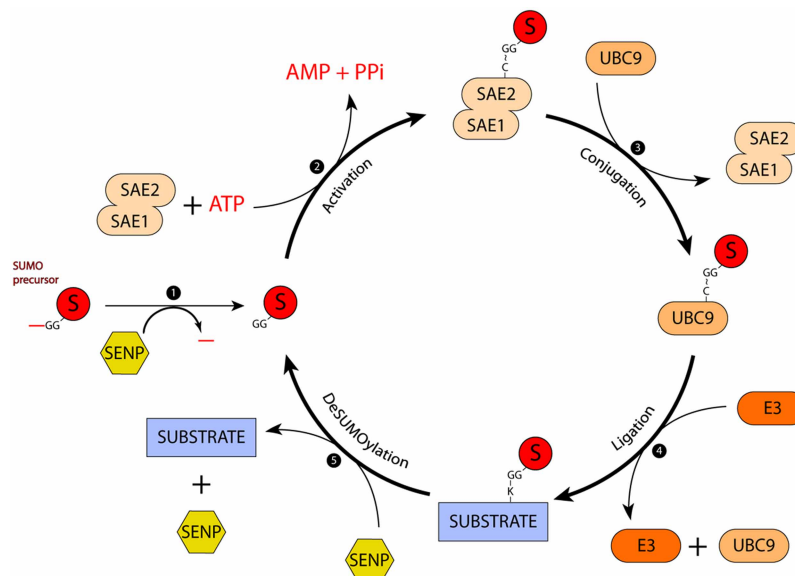

**Figure 1. The SUMOylation/deSUMOylation cycle.**

(1) First, SENPs process newly synthesized SUMO precursor into mature SUMO. (2) Then, SUMO's exposed di-glycine forms a thioester bond with the SAE2's catalytic cysteine in an ATP-dependent manner. (3) SUMO is then passed from the SAE1/SAE2 E1 activating heterodimer to the E2 conjugating enzyme UBC9, which also forms a thioester bond. (4) Substrates can be directly modified by E2-SUMO, but E3s might enhance conjugation rates by binding either E2-SUMO or substrates. (5) SENPs cleave the isopeptide bond and SUMO as well as the substrate are recycled. S: SUMO. ~: thioester bond.

the role of SUMO during embryonic development highlighting the most recent studies related to organogenesis (Table 2). In each section, we first review the expression and/or roles of SUMOs, E1, E2, ligases or proteases and then, we provide examples of SUMO target proteins and the effect of SUMOylation in their function during development.

## SUMO in the germ cells

Primordial germ cells are a specialized population of cells that undergo meiosis to generate gametes, oocytes and spermatozoa. This involves several tightly coordinated processes such as pairing of homologous chromosomes, formation of the synaptonemal complex (SC) and the completion of meiotic recombination that leads to physical attachments between homologous chromosomes.

In yeast, both Ubc9 and Smt3 localize to synapsed regions of meiotic chromosomes. An *ubc9-t* mutant exhibited inefficient synapsis [7] and a meiotic *smt3* reduction-of-function strain displayed abnormal levels of crossover recombination and diminished SC assembly [8]. These studies show that SUMOylation regulates chromosome synapsis during meiosis in budding yeast [9]. In *Drosophila*, mutations of the *Drosophila* UBC9 homologue *lesswright* (*lwr*), associated with either insertions in the 5'untranslate region (*lwr*<sup>5486</sup>) or with a point mutation (G-to-A) in the coding region that leads to substitution of Arg<sub>104</sub> by His (*lwr*<sup>5</sup>), show defects in meiotic chromosome segregation [10]. In *C. elegans*, the homolog of SUMO1, SMO-1 and the E2 conjugation enzyme UBC9 localize to germline nuclei throughout prophase I [11]. Both, the *smo-1(ok359)* null mutant and *ubc9(tm2610)* mutant, with deletion of the sequences that encoded for the catalytic domain, were sterile. Although the germ cells enter the meiotic prophase, they have defects in meiotic progression and failed to form normal sperm and oocytes [12]. All these studies show the important roles for SUMOylation during meiosis that include the maintenance of meiotic centromeric heterochromatin, meiotic DNA double-strand break repair and homologous recombination, centromeric coupling and the assembly of the SC [13].

## Spermatogenesis

The roles that SUMO plays during spermatogenesis include meiotic sex chromosome inactivation, centromeric heterochromatin organization, XY body formation, microtubule nucleation and nuclear restructuring [14–18].

**Table 1 E3 SUMO ligases and deSUMOylases**

Part 1 of 2

| Organism             | Name                           | Tissue expression/Subcellular localization                      | Mammalian Ortholog | Biological/Cellular process                                                                                                    | References    |
|----------------------|--------------------------------|-----------------------------------------------------------------|--------------------|--------------------------------------------------------------------------------------------------------------------------------|---------------|
| <b>E3 Ligases</b>    |                                |                                                                 |                    |                                                                                                                                |               |
| <i>S. cerevisiae</i> | Uli1/Siz1                      | -                                                               | PIAS4              | Sumoylation of septins and histone H3, Mitosis                                                                                 | [99,100]      |
|                      | Nfi1/Siz2                      | -                                                               | PIAS4              | Septin regulation                                                                                                              | [101,102]     |
|                      | Cst9/Zip3                      | -                                                               | RNF212             | Synaptonemal complex formation, Meiosis                                                                                        | [103]         |
|                      | Mms21                          | -                                                               | NSE2               | DNA replication and repair                                                                                                     | [104,105]     |
| <i>C. elegans</i>    | GEI-17                         | Germ cells, embryo, pharinx, neurons                            | PIAS2-4            | Meiosis, Telomere positioning, DNA damage                                                                                      | [32,106–108]  |
| <i>Drosophila</i>    | tonalli                        | Salivary gland, Ring gland, imaginal discs, other tissues       | ZMIZ1, ZMIZ2       | Chromatin modification                                                                                                         | [109–112]     |
|                      | Suppressor of variegation 2-10 | Nervous system, reproductive system, other tissues              | PIAS1-4            | Chromatin modification, JAK-STAT signaling                                                                                     | [113–115]     |
| Mammals              | RNF212                         | Ubiquitous, Germ cells                                          | -                  | Meiotic recombination                                                                                                          | [23]          |
|                      | PIAS1                          | Ubiquitous, Germ cells                                          | -                  | Embryogenesis, Neuronal differentiation, Cardiac development                                                                   | [50,58,81]    |
|                      | PIAS2                          | Testis, pancreas, others/ PML body                              | -                  | Post-Synaptic dendritic differentiation                                                                                        | [82]          |
|                      | PIAS3                          | Ubiquitous/Nucleus                                              | -                  | Neuronal differentiation, Steroidogenic tissue, Retinal differentiation                                                        | [66,79,87]    |
|                      | PIAS4                          | Ubiquitous, enhanced in testis/ PML body                        | -                  | Early embryogenesis stage                                                                                                      | [51]          |
|                      | RanBP2                         | Ubiquitous/Nuclear membrane and vesicles                        | -                  | Macromolecular transport                                                                                                       | [116]         |
|                      | NSE2                           | Ubiquitous/Nucleus                                              | -                  | Myogenic differentiation, DNA damage repair                                                                                    | [117]         |
|                      | ZNF451                         | Ubiquitous/Nucleoplasm                                          | -                  | SUMO chain formation                                                                                                           | [2]           |
|                      | Pc2/CBX4                       | Ubiquitous/Nucleoplasm and nuclear bodies                       | -                  | Heart development                                                                                                              | [54]          |
|                      | TOPORS                         | Ubiquitous/Nucleoplasm                                          | -                  | Chromatin modification                                                                                                         | [118]         |
|                      | SLX4                           | Ubiquitous/Nucleoplasm, cytosol and cell junctions              | -                  | Genome maintenance                                                                                                             | [119]         |
|                      | hDREF                          | Ubiquitous                                                      | -                  | Nucleosome remodeling and cell proliferation                                                                                   | [120]         |
|                      | MAPL                           | Nucleoplasm, mitochondria and cytosol                           | -                  | Mitochondrial fission                                                                                                          | [121]         |
|                      | Krox20                         | Ubiquitous                                                      | -                  | Hindbrain development                                                                                                          | [78]          |
|                      | ZMIZ1                          | Ovary, prostate, spleen and testis/Nucleoplasm                  | -                  | Embryonic development, vascular development                                                                                    | [111,122,123] |
|                      | ZMIZ2                          | Gallbladder, testis and germ cells/Nucleoplasm and mitochondria | -                  | Embryonic development of neural tissue                                                                                         | [111,124]     |
|                      | TRIM 1–19–22<br>–27–28–32–39   | Subcellular proteinaceous bodies                                | -                  | Senescence, Apoptosis, Innate immunity, Antiviral defense, Gene silencing, Autophagy, Genomic stability                        | [125–130]     |
| <b>DeSUMOylases</b>  |                                |                                                                 |                    |                                                                                                                                |               |
| <i>S. cerevisiae</i> | Ulp1                           | Nuclear pore                                                    | SEN1, SEN2         | Cell cycle progression, Telomeric silencing, DNA damage                                                                        | [131,132]     |
|                      | Ulp2                           | Nucleoplasm                                                     | SEN6               | Cell cycle, DNA damage, DNA replication                                                                                        | [133,134]     |
| <i>C. elegans</i>    | ulp-1                          | Neurons, intestine, germ line, body wall muscle cell            | SEN1               | Meiosis, embryonic development                                                                                                 | [135]         |
|                      | ulp-2                          | Hypodermis and neuroblasts/ Cytosol and nucleus                 | SEN7               | Embryonic development                                                                                                          | [136]         |
|                      | ulp-4                          | Body wall musculature, hypodermis/Mitochondrial matrix          | SEN7               | Cholesterol metabolism cell cycle, Unfolded protein response                                                                   | [137–139]     |
|                      | ulp-5                          | n.s.                                                            |                    | Predicted deSUMOylase                                                                                                          | [138]         |
| <i>Drosophila</i>    | Ulp1                           | Early embryo, embryonic CNS, adult germ line, other tissues     | SEN1, SEN2         | Central nervous system projection neuron axonogenesis, negative regulation of Toll signaling pathway and inflammatory response | [140–142]     |

Continued

**Table 1 E3 SUMO ligases and deSUMOylases**

Part 2 of 2

| Organism | Name    | Tissue expression/Subcellular localization                                                                 | Mammalian Ortholog | Biological/Cellular process                                                                                    | References      |
|----------|---------|------------------------------------------------------------------------------------------------------------|--------------------|----------------------------------------------------------------------------------------------------------------|-----------------|
| Mammals  | CG12717 | n.s.                                                                                                       | SEN6,<br>SEN7      | Predicted deSUMOylase                                                                                          | [141]           |
|          | Veloren | Early embryo, embryonic CNS                                                                                | SEN7,<br>SEN6      | Axon targeting, negative regulation of cell death                                                              | [141]           |
|          | SEN1    | Ubiquitous, enhanced in testis/<br>Nuclear pore and nuclear foci                                           | -                  | Embryogenesis, Mitotic progression,<br>Senescence, Hematopoiesis                                               | [47,143–146]    |
|          | SEN2    | Ubiquitous/Nuclear pore, nuclear<br>foci, cytoplasm                                                        | -                  | Trophoblast development, cardiac development,<br>Myogenesis                                                    | [48,54,147,148] |
|          | SEN3    | Ubiquitous/Nucleolus                                                                                       | -                  | Osteogenic differentiation, Sarcomere<br>organization, Oocyte meiosis, Ribosome<br>biogenesis                  | [29,60,149,150] |
|          | SEN5    | Nucleolus and mitochondria                                                                                 | -                  | Ribosome biogenesis, RNAPII-mediated<br>transcription 47S rRNA, tmitochondrial<br>fragmentation during mitosis | [151,152]       |
|          | SEN6    | Ubiquitous/Nucleoplasm                                                                                     | -                  | Osteochondro-progenitor homeostasis,<br>Hematopoiesis                                                          | [153,154]       |
|          | SEN7    | Ubiquitous/Nucleoplasm                                                                                     | -                  | Neuronal differentiation, Chromatin remodeling                                                                 | [76,155]        |
|          | DeSI1   | Ubiquitous, enhanced in<br>gastrointestinal tract, pancreas<br>and muscle tissues/Cytoplasm<br>and nucleus | -                  | Modulation transcriptional repressor activity                                                                  | [5]             |
|          | DeSI2   | Cytoplasm                                                                                                  | -                  | Modulation transcriptional repressor activity                                                                  | [5]             |
|          | USPL1   | Ubiquitous, enhanced in<br>gastrointestinal tract and kidney/<br>Cajal bodies                              | -                  | RNAPII-mediated snRNA transcription                                                                            | [4,156]         |

The organism, tissue expression, subcellular localization, orthologs and biological and cellular processes of the E3 SUMO ligases and deSUMOylases are shown.  
n.s.: not specified.

In mouse prophase I of meiosis, SUMO1 is localized to the XY body in spermatocytes, whereas only SUMO2/3 are detected near centromeres in metaphase I spermatocytes [14,15,19]. During human meiotic prophase, SUMO1 is associated with XY chromosome axes and also found in centromeric and pericentromeric heterochromatin [17,20].

The proteasome is involved in ensuring that homologous chromosomes pair each other during meiosis [21]. SUMO acts in coordination with ubiquitin-proteasome to regulate major transitions of meiotic recombination. Interestingly, in mouse, a SUMO-ubiquitin relay recruits proteasomes to the axes between homologous chromosomes to mediate chromosome pairing and recombination between homologs. The Ring Finger Protein 212 (RNF212), involved in SUMO conjugation, mediates the formation of axis-associated SUMO conjugates, while the ubiquitin ligase Cyclin B1 Interacting Protein 1 (CCNB1IP1 or HEI10) antagonizes RNF212 by promoting its turnover from synapses chromosomes [22,23]. Recently, novel proteins modified by SUMO during spermatogenesis have been identified in human and mouse: Cyclin Dependent Kinase 1 (CDK1), RNA polymerase II (RNAP II), Cell Division Cycle 5 Like (CDC5), Piwi Like RNA-Mediated Gene Silencing 2 (PIWIL2 or MILI), DEAD-Box Helicase 4 (DDX4), TAR DNA Binding Protein (TARDBP or TDP-43) and Serine/Threonine Kinase 31 (STK31); but the functional role of SUMOylation of these factors in spermatogenesis has not been reported [24,25].

## Oogenesis

During mouse oocyte maturation and growth, different expression patterns and protein localizations have been described for SUMO1 and SUMO2/3 [18]. In transcriptionally active oocytes, both SUMO1 and SUMO2/3 are localized to the nucleoplasm and chromatin. In transcriptionally quiescent oocytes, SUMO1 is weakly detected with chromatin, while SUMO2/3 is localized throughout the nucleoplasm and on chromatin [26]. During oocyte maturation, SUMO1 is localized to the spindle poles in prometaphase I, metaphase I and II stages and around the separating homologues in anaphase I and telophase I stages of first meiosis. SUMO 2/3 is mainly

**Table 2 SUMOylation components in developmental processes**

Part 1 of 2

| Organ/Process         | SUMO/<br>Ubc9                      | E3<br>Ligase | De<br>SUMOylase | Target           | Organism                                              | Pathway/Function                                                                                                                     | Reference                       |
|-----------------------|------------------------------------|--------------|-----------------|------------------|-------------------------------------------------------|--------------------------------------------------------------------------------------------------------------------------------------|---------------------------------|
| Germ cells            | Ubc9                               |              |                 |                  | Yeast                                                 | Chromosome synapsis during meiosis                                                                                                   | [7]                             |
|                       | Smt3                               |              |                 |                  | Yeast                                                 | Chromosome synapsis during meiosis                                                                                                   | [8]                             |
|                       | Lwr                                |              |                 |                  | Drosophila                                            | Defects in meiotic chromosome segregation                                                                                            | [10]                            |
|                       | SMO-1<br>UBC9                      |              |                 |                  | <i>C. elegans</i><br><i>C. elegans</i>                | Sterility<br>Sterility                                                                                                               | [12]<br>[12]                    |
| Spermatogenesis       |                                    | RNF212       |                 |                  | Mouse                                                 | Formation of axis-associated SUMO conjugates                                                                                         | [22]                            |
|                       |                                    |              |                 | CDK1             | Mouse                                                 | n.s.                                                                                                                                 | [25]                            |
|                       |                                    |              |                 | RNAPII           | Mouse                                                 | n.s.                                                                                                                                 | [25]                            |
|                       |                                    |              |                 | CDC5             | Mouse                                                 | n.s.                                                                                                                                 | [25]                            |
|                       |                                    |              |                 | PIWIL2 or MILI   | Mouse                                                 | n.s.                                                                                                                                 | [25]                            |
|                       |                                    |              |                 | DDX4             | Mouse                                                 | n.s.                                                                                                                                 | [25]                            |
|                       |                                    |              |                 | TARDBP or TDP-43 | Mouse                                                 | n.s.                                                                                                                                 | [25]                            |
|                       |                                    |              |                 | STK31            | Mouse                                                 | n.s.                                                                                                                                 | [25]                            |
| Oogenesis             | SUMO1                              |              |                 | PLK1             | Mouse                                                 | microtubule and spindle pole organization                                                                                            | [28]                            |
|                       | SUMO2/3                            |              |                 | PLK2             | Mouse                                                 | kinetochore                                                                                                                          | [28]                            |
|                       |                                    |              | SEN2<br>SEN3    |                  | Mouse<br>Mouse                                        | metaphase II spindle organization<br>G2-M transition and spindle assembly                                                            | [27]<br>[29]                    |
|                       |                                    |              | SEN7            |                  | Mouse                                                 | meiosis and egg maturation                                                                                                           | [30]                            |
|                       |                                    | GEI-17       |                 | KLP-19           | <i>C. elegans</i>                                     | Recruitment to the Ring Complex                                                                                                      | [31]                            |
|                       |                                    |              |                 | BUB-1            | <i>C. elegans</i>                                     | Localization between segregating chromosomes during early anaphase I                                                                 | [32]                            |
|                       |                                    |              |                 | CLS-2            | <i>C. elegans</i>                                     | Localization to central spindle                                                                                                      | [32]                            |
|                       | SUMO1                              |              |                 | Septin2          | Mouse                                                 | Chromosome congression and meiosis progression                                                                                       | [33]                            |
|                       | Ubc9                               |              |                 |                  | Mouse                                                 | nuclear organization and chromosome segregation at postimplantation stage                                                            | [36]                            |
|                       | Smt3, Lwr<br>UBC9<br>ubc9<br>SUMO2 |              |                 |                  | Drosophila<br><i>C. elegans</i><br>Zebrafish<br>Mouse | early embryogenesis<br>embryogenesis<br>embryogenesis<br>Embryogenesis, stage E10.5, growth, cell proliferation, cell survival       | [37–39]<br>[40]<br>[41]<br>[42] |
| Embryogenesis and ZGA |                                    |              | SEN1            | HIF1alpha, GATA1 | Mouse                                                 | Mid-gestational embryogenesis; Erythropoiesis; placental development                                                                 | [45–47]                         |
|                       |                                    |              | SEN2            | p53/Mdm2         | Mouse                                                 | Cell cycle progression during mouse trophoblast development, endoreduplication                                                       | [48]                            |
|                       |                                    | PIAS1        |                 |                  | Mouse                                                 | Embryogenesis, stages E10.5 and E12.5, red blood cells, angiogenesis, capillary plexus and blood vessel formation, heart development | [50]                            |
|                       |                                    | PIAS4        |                 | DPPA2            | Mouse                                                 | zygotic genome activation; chromosome segregation; heterochromatin state                                                             | [51,52]                         |
|                       |                                    |              |                 |                  |                                                       |                                                                                                                                      |                                 |

Continued

Downloaded from http://port.silverchair.com/biochemtrans/article-pdf/48/2/463/3731/bst-2019-0390c.pdf by guest on 16 April 2024

**Table 2 SUMOylation components in developmental processes**

Part 2 of 2

| Organ/Process                                  | SUMO/<br>Ubc9               | E3<br>Ligase       | De<br>SUMOylase | Target                                              | Organism                                                 | Pathway/Function                                                                                                                                                                                           | Reference       |
|------------------------------------------------|-----------------------------|--------------------|-----------------|-----------------------------------------------------|----------------------------------------------------------|------------------------------------------------------------------------------------------------------------------------------------------------------------------------------------------------------------|-----------------|
| Heart                                          |                             |                    | SEN2            | cyclin and<br>cyclin-dependent<br>kinase inhibitors | Transgenic mice<br>overexpressing<br>human SEN2<br>Mouse | cardiomyocyte proliferation                                                                                                                                                                                | [54,55]         |
|                                                | SUMO1                       |                    | SEN5            |                                                     | Mouse                                                    | cell death                                                                                                                                                                                                 | [56]            |
|                                                |                             |                    | SEN2            | Pc2/CBX4                                            | Mouse                                                    | SUMO1-conjugated CBX4<br>decreases cardiomyocyte<br>proliferation/suppressing the<br>expression of Gata4 and Gata6/<br>regulation of chromatin remodelling<br>complexes                                    | [54]            |
|                                                |                             | PIAS1              |                 | GATA4                                               | Mouse                                                    | enhanced transcriptional activity                                                                                                                                                                          | [57,58]         |
|                                                | SUMO1                       | PIAS1              |                 | Nkx2.5                                              | Mouse                                                    | enhanced transcriptional activity                                                                                                                                                                          | [53,59]         |
|                                                |                             |                    |                 | SRF                                                 | Mouse                                                    | enhanced transcriptional activity/<br>synergy with Nkx2.5 in activation of<br>cardiac target genes                                                                                                         | [59,157,158]    |
|                                                | SUMO1                       | PIAS1              |                 | MEF2                                                | Mouse                                                    | reduced transcriptional activity                                                                                                                                                                           | [159–162]       |
|                                                |                             |                    |                 | myocardin                                           | Mouse                                                    | enhanced transcriptional activity                                                                                                                                                                          | [163]           |
|                                                |                             |                    |                 | Prox1                                               | Human                                                    | downregulation corepressor activity,<br>increased transcriptional activity                                                                                                                                 | [164,165]       |
|                                                |                             |                    |                 | Tbx2/Tbx5                                           | Human, mouse,<br><i>C. elegans</i>                       | pharyngeal muscle development                                                                                                                                                                              | [108,166]       |
| Osteogenic<br>differentiation                  |                             |                    | SEN3            | RbBP5                                               | Human                                                    | activation of HOX gene DLX3                                                                                                                                                                                | [60]            |
| Adrenal Gland                                  | SUMO1                       | PIAS1,<br>PIAS3    |                 | SF1                                                 | Human, mouse                                             | Attenuation of its transcriptional<br>capacity                                                                                                                                                             | [64–66]         |
|                                                | Smt3                        |                    |                 | Ftz-f1                                              | Drosophila                                               | Sterol uptake. Attenuation of its<br>transcriptional capacity                                                                                                                                              | [69,70]         |
|                                                | SMO-1                       |                    |                 | NHR-25                                              | <i>C. elegans</i>                                        | cell fate of reproductive organs                                                                                                                                                                           | [71]            |
| Neuronal<br>development and<br>differentiation |                             |                    | SEN2            | Drp1                                                | mouse                                                    | neurodegeneration through the<br>modulation of mitochondrial<br>morphogenesis                                                                                                                              | [75]            |
|                                                |                             |                    | SEN7            | Braf35                                              | Mouse                                                    | neuronal differentiation<br>repression of neuronal specific<br>genes and inhibition of neuronal<br>differentiation                                                                                         | [76]<br>[77]    |
|                                                | SUMO1,<br>2, 3              | Krox20<br>PIAS1, 3 | SEN2            | Nab<br>FOXP2                                        | Human                                                    | negative regulation<br>modulates transcriptional activity on<br>downstream target genes (DISC1,<br>SRPX2, and MIR200c); Purkinje cell<br>development, cerebellar motor<br>function and vocal communication | [78]<br>[79–81] |
|                                                |                             | PIAS2              |                 | MEF2A                                               | Human, rat                                               | represses transcriptional activity;<br>postsynaptic dendritic<br>differentiation                                                                                                                           | [82]            |
|                                                |                             |                    |                 |                                                     |                                                          |                                                                                                                                                                                                            |                 |
|                                                | ubc9                        |                    |                 | Sp1                                                 | <i>Xenopus laevis</i>                                    | promotes retinal progenitor<br>proliferation by repressing the cell<br>cycle exit; suppresses p27Xic1<br>expression                                                                                        | [84]            |
| Retinal proliferation<br>and differentiation   | Smt3,<br>Aos1/<br>Uba2, Lwr |                    |                 |                                                     | Drosophila                                               | proliferating cells in the developing<br>eye                                                                                                                                                               | [85,86]         |
|                                                |                             | PIAS3              |                 | Nr2e3                                               | Mouse                                                    | specification of the rod subtype in<br>the retina while preventing cone-like<br>characteristics                                                                                                            | [87]            |

Proteins modified by SUMO in Germ Cells, embryogenesis, ZGA, Heart, osteogenic differentiation, adrenal gland, Neuronal development and differentiation and retinal proliferation and differentiation. The organism, SUMO ligases, DeSUMOylases, their targets, and the pathway and function are shown.

n.s.: not specified.

ZGA: zygotic genome activation.



concentrated near centromeres [27]. Interestingly, the SUMOylation of the Polo-like kinase 1 (PLK1) by different SUMO paralogues correlates with its different functions and localizations: PLK1 modification by SUMO1 is related to its function in microtubule and spindle pole organization, whereas modification by SUMO2/3 regulates its function at the kinetochore [28].

Studies in mouse show the important roles of deSUMOylases during oogenesis. The overexpression of Senp2 led to defects in metaphase II spindle organization in mature eggs [27]. Other examples are the regulation of G2-M transition and spindle assembly by SENP3 [29] and the meiotic arrest and decrease of mature eggs in SENP7 deficient oocytes [30].

SUMO modification plays also a role in chromosome congression in oocyte meiosis in *C. elegans* by regulating the multi-protein ring complex (RC) assembly [31]. There, the SUMO E3 ligase GEI-17 modifies and recruits the kinesin KLP-19 to the RC. Recently, the same group showed that SUMO regulates the dynamic localization of the central spindle proteins Mitotic Checkpoint Serine/Threonine Kinase (BUB-1) and CLS-2 during female meiosis [32]. Few SUMO modified proteins have been identified in mouse oocyte. As an example, the GTP binding protein Septin2 is modified by SUMO1 and its inhibition showed that it plays an essential role in regulating chromosome congression and meiosis progression [33]. Thus, SUMO1 plays crucial roles during meiotic oocyte maturation by regulating spindle organization, chromosome congression and chromosome segregation [34]. In addition to the role in oogenesis, SUMOylation is also required for the communication of the oocyte with the ovarian somatic cells [35].

## SUMO in embryogenesis and zygotic genome activation (ZGA)

SUMO plays important roles in embryogenesis, as revealed by embryonic lethality when the conjugating enzyme UBC9 is deleted or knocked-down. *Ubc9* deficient mouse embryos show severe defects in nuclear organization and chromosome segregation, and die at early post implantation stage [36]. In *Drosophila* embryogenesis, Smt3 coordinates multiple regulatory pathways and loss of function mutations in *Ubc9* results in impaired embryogenesis [37–39]. Embryonic arrest is also observed in *Ubc9* knockdown in *C. elegans* and zebrafish [40,41].

In mouse, the SUMOs orthologues have non-overlapping roles during embryonic development. SUMO2 is expressed at higher levels than SUMO3 in early embryonic stages and is indispensable for embryonic development, as shown by the phenotype of the null mutant mice. *Sumo2*<sup>-/-</sup> embryos die at stage E10.5 and exhibit severe growth retardation with reduced cell proliferation and increased cell death. However, embryos deficient in SUMO3 are viable [42]. Similarly, SUMO1 deficient mice are viable, likely because its function can be compensated by SUMO2 or SUMO3 [43,44].

Consistently with a central role for SUMOylation in embryonic development, knockout mice of the SUMO proteases SENP1 or SENP2 are mid-gestational embryonic lethal [45,46]. Mutations of *SENP1* in mouse produce defects in erythropoiesis by impairing the physiological deSUMOylation of the hematopoietic factors Hypoxia Inducible Factor 1 Subunit Alpha (HIF1 $\alpha$ ) and GATA Binding Protein 1 (GATA1) [45,47]. *SENP2* mutations cause deficiencies in cell cycle progression during mouse trophoblast development: SENP2 ablation disturbs the p53/Mdm2 pathway, affecting the expansion of trophoblasts progenitors and their maturation [48]. Moreover, deficiency of SUMO E3 ligases, such as PIAS1/PIASy double-knockout mice, impairs embryonic development between E10.5 and E12.5 in mouse [49,50].

While early phases of embryonic development are driven by maternal determinants, development comes under the control of the zygotic genome activation (ZGA) after fertilization. Two recent studies have analyzed the function of SUMOylation in regulating the maternal to zygotic transition and ZGA. Overexpression of the E3 ligase PIAS4 in mouse zygotes inhibited ZGA and impaired early embryo development. PIAS4 effect is partially caused by the SUMOylation of Developmental Pluripotency Associated 2 (DPPA2), which converts this transcriptional activator to a potent inhibitor of zygotic transcriptional program [51]. In agreement, another study shows that overexpression of PIAS4 after fertilization led to a failure of chromosome segregation and impaired ZGA, due to the enhanced SUMO ligase activity. Overexpressed PIAS4 disturbed the demethylation of histone H3 lysine 9 trimethylation (H3K9me3), affecting the heterochromatin state [52].

## SUMO in developing tissues and organs

To illustrate the role of SUMO in different developmental pathways, we selected several examples in which SUMO components and SUMOylation of transcription factors play fundamental roles in organ development.

## Heart development

The enrichment of SUMO1 and SUMO2 mRNAs in cardiac chamber regions undergoing proliferation and differentiation suggests a central role for SUMOylation in heart development [53]. A critical issue to achieve correct cardiac development is the balance between SUMOylation/deSUMOylation. Deletion of the deSUMOylating enzyme SENP2 in mice caused defects in cardiac development due to decreased cardiomyocyte proliferation: knockout of *SENP2* lead to accumulation of SUMO1-conjugated Chromobox 4 or Polycomb 2 Homolog (Pc2/CBX4), a subunit of the polycomb repressive complex 1 (PRC1). SUMOylation of Pc2/CBX4 facilitated its binding to H3K27me3, suppressing the expression of the cardiac transcription factors encoding genes *Gata4* and 6 [54], revealing a role for SUMOylation in the regulation of chromatin remodelling complexes during cardiogenesis. Moreover, SENP2 overexpression produced abnormal cardiomyocyte proliferation, with dysregulation of cyclin and cyclin-dependent kinase inhibitors, leading to cardiac defects [55]. Likewise, overexpression of SENP5 in mouse cardiomyocytes increased cell death and led to cardiomyopathy. Indeed, dysregulated levels of SENP5 and SUMO conjugation are observed in human failing hearts [56]. A role for PIAS1 has also been described for erythropoiesis and angiogenesis in the yolk sac. PIAS1 regulates proliferation in cells from the endoderm and mesoderm and its inactivation reduces the myocardium muscle mass, impairing cardiac development [50].

SUMO modifies a multitude of transcription factors that are important for normal cardiac development. These factors include NK2 homeobox 5 (Nkx2.5), GATA4 and 6, Serum Response Factor (SRF), myocyte enhancer factor-2 (MEF2), myocardin, T-box transcription factors-2 and -5 (TBX2 and 5) and prospero-related homeobox (Prox1) [57]. The zinc finger-containing transcription factor GATA4 is modified by SUMO1 in its transactivation domain, which results in enhanced transcriptional activity. The E3 ligase PIAS1 enhances the GATA4 SUMOylation efficiency via its RING finger domain [58]. Similarly, SUMO1 modification of the homeodomain transcription factor Nkx2.5 by PIAS1 increased its transcriptional activity by enhancing the physical association with its binding partners [53,59].

## Osteogenic differentiation

Mesenchymal stem cells have the ability to differentiate into multiple cell types including adipocytes, chondrocytes and osteocytes. SUMOylation is required for the epigenetic control of gene expression during osteogenic differentiation of human stem cells. Notably, some studies show that SUMO affects the expression of *HOX* genes, which are evolutionary conserved master regulators that determine body plan in vertebrate development. For instance, the SUMO isopeptidase SENP3 associates with the Lysine Methyltransferase 2A and 2D (KMT2A/KMT2D or MLL1/MLL2) histone methyltransferase complexes and catalyzes the deSUMOylation of RB Binding Protein 5 (RbBP5), which is required for activation of *HOX* genes such as *Distal-Less Homeobox (DLX3)* [60]. A recent study by this group further showed that flightless-I-homolog (FLII), member of the gelsolin family of actin-remodelling proteins, determines the SENP3 recruitment and MLL1/2 complex assembly on the *DLX3* gene [61].

## Adrenal gland development and hormone synthesis

SUMO function is necessary in cell fate determination during adrenal gland development. SUMOylation components are expressed in human adrenal cortex and SUMO modification of transcription factors Steroidogenic Factor 1 (SF-1 or NR5A1), Wilms Tumor Protein 1 (WT1), GLI Family Zinc Finger 3 (GLI3), Spalt Like Transcription Factor 1 (SALL1) and Nuclear Receptor Subfamily 0 Group B Member 1 (NR0B1 or DAX1) have been described [62,63]. SF-1, member of the NR5A subfamily of nuclear receptors, is crucial for the development of the adrenal gland and for the expression of steroidogenic genes. SF-1 interacts with UBC9, PIAS1 and PIAS3 and is modified by SUMO, which results in attenuation of its transcriptional capacity [64–66]. Interestingly, a knock-in mouse model expressing a non-SUMOylatable form of SF-1 exhibits endocrine abnormalities and changes in cell fate, due in part to the inappropriate activation of the Hedgehog signalling [67]. The resulting mutant adrenal glands in this model exhibit a persistent foetal tissue, suggesting that SUMOylation interferes as well with normal maturation. Indeed, another recent study shows that foetal adrenal cortex regression is controlled by the synergistic interaction between SF-1 SUMOylation and DAX1, a nuclear receptor corepressor that interacts with SF-1 and inhibits genes involved in adrenal development and steroidogenesis [68]. In *Drosophila*, SUMO is as well required in steroidogenic tissues for the synthesis of steroid hormones [69]. *Drosophila* SF-1 homolog Fushi Tarazu Transcription Factor 1 (Ftz-f1) is modified by SUMO and



is involved in sterol uptake, in part through the scavenger receptor member *Snmp1* [70]. In addition, SUMOylation of the *C. elegans* homologue *NHR-25* regulates its activity and maintains proper cell fate during development of the reproductive organs [71].

## Neuronal development and differentiation

SUMOylation exerts a central role during embryonic brain development. Several studies have analyzed the spatiotemporal distribution of the SUMO moieties, UBC9, SAE1, SENP1 and SENP6 in the developing mouse and rat brains [72–74]. Total conjugation by SUMO1 and SUMO2/3 peaked at E12, whereas the highest levels of UBC9 expression were detected between E15 and E18.

Similarly to the heart, a controlled SUMOylation and deSUMOylation balance is important in the developing brain. A mouse model deficient for SENP2 in neural progenitors shows increased neuronal SUMOylation levels and produces neurodegeneration through the modulation of mitochondrial morphogenesis. This degeneration is a consequence of the hyper-SUMOylation of Dynamin-related protein 1 (*Drp1*), which promotes its association with mitochondria and neuronal apoptosis [75]. Recent studies showed that SENP7 is involved as well in proper neuronal differentiation [76].

SUMO regulates the function of several transcription factors during neuronal differentiation, including PHD Finger Protein 21A (*PHF21A* or *Braf35*), Early Growth Response 2 (*EGR2* or *Krox20*), Myocyte Enhancer Factor 2A (*MEF2A*) and Forkhead Box P2 (*Foxp2*). In mouse developing brain, *Braf35*, a subunit of the LSD1-CoREST histone demethylase complex, is expressed in immature neurons. SUMOylation of *Braf35* is required for the repression of neuronal specific genes and for the inhibition of neuronal differentiation [77]. An interesting case of cross-regulation is exemplified by the zinc finger transcription factor *Krox20*, which has essential roles in vertebrate hindbrain segmentation. *Krox20* was described as a SUMO ligase for its coregulators, the NGFI-A Binding (*Nab*) proteins. As a consequence, the SUMOylation of *Nab* by *Krox20* negatively modulates *Krox20* activity and the extension of *Krox20*-positive territories [78]. During neuronal differentiation in the cerebellum, SUMOylation of the transcription factor *FOXP2* increases, as a result of the function of *PIAS1* and *PIAS3* SUMO ligases and isopeptidase *SENP2* [79,80]. This modification is required for the regulation of cerebellar motor function and vocal communication [81]. SUMOylation is also involved in the postsynaptic dendritic differentiation in the cerebellar cortex. The E3 ligase *PIAS2* induces SUMO modification of the transcription factor Myocyte Enhancer Factor 2A (*MEF2A*), repressing the *MEF2*-dependent transcription in neurons [82]. Furthermore, the SUMOylation machinery participates in the synapse plasticity and is associated with neurodegenerative diseases [83].

## Retinal proliferation and differentiation

During embryonic development, the vertebrate retina originates from the central nervous system. In *Xenopus laevis*, *ubc9* controls retinal progenitor proliferation by repressing the cell cycle exit in an high mobility group box 3 (*hmgb3*)-dependent manner. This function is partially mediated by the SUMOylation of the transcription factor *Sp1*, which suppressed *p27Xic1* expression leading to the promotion of retinal progenitor proliferation [84]. In *Drosophila*, knockdown of *Smt3* or *E1* and *E2* enzymes disrupts the proliferating cells in the developing eye, as well as in other imaginal tissues [85,86].

Two retina photoreceptors, rods and cones, arise from a common progenitor. Interestingly, SUMOylation promotes the specification of the rod subtype in the retina while preventing cone-like characteristics. This function involves the E3 SUMO ligase *PIAS3* that SUMOylates the transcription factor Nuclear Receptor Subfamily 2 Group E Member 3 (*Nr2e3*) and converts it into a repressor of cone-specific gene expression [87]. In addition, *PIAS3* has been involved in establishing dorsoventral patterning and visual response of cone photoreceptors in the mouse retina [88].

## Conclusions

The development of organisms requires a fine-tune regulation of diverse signalling pathways. Several findings during the last years have unravelled the crucial role of SUMOylation for developmental and differentiation processes through the modification of relevant transcription factors. To these previous examples, we could add the role of SUMOylation during limb development. For instance, wing formation in *Drosophila* depends on the regulation of the *SALL* transcription factors by SUMO [89,90], or the role of SUMOylation in hedgehog signalling, a pathway that is relevant in limb formation [91]. In addition, SUMOylation of epigenetic regulators modifies their transcriptional activity, localization or stability. Additional complexity is driven by the interplay

of SUMOylation with other post-translational modifications such as acetylation, phosphorylation or ubiquitylation. By the modification of transcription factor and chromatin remodelers, SUMO is involved in the regulation of cell division, cell lineage commitment, specification, and differentiation during the developmental processes.

A fine balance of SUMOylation/deSUMOylation is required during embryonic development and for normal cardiac and neuronal development. The disruption of the SUMO homeostasis led to inhibition of cell cycle progression, changes in gene expression through chromatin remodelling and to apoptosis. Thus, in normal physiological conditions, the isopeptidase activity is essential to maintain a stable fraction of SUMO modified proteins. Interestingly, changes in SENPs levels that disrupts SUMO equilibrium are observed also in several carcinomas. For example, in hepatocellular carcinoma, the complex between Cbx4 and PIASy mediates hypoxia-induced angiogenesis through enhancing HIF-1 $\alpha$  sumoylation and increasing the transcriptional activity of HIF-1 [92].

A crucial step to understand the diverse cellular functions of this modification is the detection of targets of SUMOylation *in vivo*, due to the low abundance of the SUMOylated forms for any given target. For this reason, the technology to identify SUMO targets is crucial. Emergence of new techniques for the analysis of protein SUMOylation and characterization of the SUMO pathway across species and organs have been described [93–96]. Remarkably, as dysregulation of SUMO conjugation is associated to different human diseases it represents a potential therapeutic target. The study of *in vivo* role of SUMOylation in higher eukaryotes and also in more simple organisms with powerful genetic tools such as yeasts and invertebrates [97,98] will allow to elucidate more functions of SUMO targets during development.

## Perspectives

1. SUMOylation has been proven crucial in the regulation of developmental processes.
2. Fine-tuning of key transcription factors function and signalling pathways components by SUMOylation contributes to modulate developmental processes.
3. Generation of new technologies to identify SUMOylation targets *in vivo* in model systems and in an organ specific manner will be crucial to achieve a more complete knowledge of the role of SUMO during development.

## Competing Interests

The authors declare that there are no competing interests associated with the manuscript.

## Acknowledgements

We apologize to those whose related publication could not be cited due to space limitations. We are grateful to all members of Barrio's Lab for comments and suggestions. R.B. acknowledges grants BFU2017-84653-P (MINECO/AEI/FEDER/EU), SEV-2016-0644 (Severo Ochoa Excellence Program, MINECO/AEI), 765445-EU (UbiCODE Program, EU), SAF2017-90900-REDT (UBIRed Program, MINECO/AEI).

## Abbreviations

CDC5, cell division cycle 5; CDK1, cyclin dependent kinase 1; DDX4, DEAD-box helicase 4; GATA1, GATA binding protein 1; MEF2, myocyte enhancer factor-2; PLK1, Polo-like kinase 1; RC, ring complex; RNF212, ring finger protein 212; RanBP2, Ran-binding protein 2; RbBP5, RB Binding Protein 5; SC, synaptonemal complex; SENPs, sentrin-specific proteases; SRF, serum response factor; STK31, Serine/Threonine Kinase 31; USPL1, ubiquitin-specific protease-like 1; ZGA, zygotic genome activation.

## References

- 1 Flotho, A. and Melchior, F. (2013) Sumoylation: a regulatory protein modification in health and disease. *Annu. Rev. Biochem.* **82**, 357–385 <https://doi.org/10.1146/annurev-biochem-061909-093311>
- 2 Koidl, S., Eisenhardt, N., Fatouros, C., Droscher, M., Chaugule, V.K. and Pichler, A. (2016) The SUMO2/3 specific E3 ligase ZNF451-1 regulates PML stability. *Int. J. Biochem. Cell. Biol.* **79**, 478–487 <https://doi.org/10.1016/j.biocel.2016.06.011>

- 3 Pichler, A., Fatouros, C., Lee, H. and Eisenhardt, N. (2017) SUMO conjugation: a mechanistic view. *Biomol. Concepts* **8**, 13–36 <https://doi.org/10.1515/bmc-2016-0030>
- 4 Schulz, S., Chachami, G., Kozackiewicz, L., Winter, U., Stankovic-Valentin, N., Haas, P. et al. (2012) Ubiquitin-specific protease-like 1 (USP1) is a SUMO isopeptidase with essential, non-catalytic functions. *EMBO Rep.* **13**, 930–938 <https://doi.org/10.1038/embor.2012.125>
- 5 Shin, E.J., Shin, H.M., Nam, E., Kim, W.S., Kim, J.H., Oh, B.H. et al. (2012) DeSUMOylating isopeptidase: a second class of SUMO protease. *EMBO Rep.* **13**, 339–346 <https://doi.org/10.1038/embor.2012.3>
- 6 Suh, H.Y., Kim, J.H., Woo, J.S., Ku, B., Shin, E.J., Yun, Y. et al. (2012) Crystal structure of DeSI-1, a novel deSUMOylase belonging to a putative isopeptidase superfamily. *Proteins* **80**, 2099–2104 <https://doi.org/10.1002/prot.24093>
- 7 Hooker, G.W. and Roeder, G.S. (2006) A role for SUMO in meiotic chromosome synapsis. *Curr. Biol.* **16**, 1238–1243 <https://doi.org/10.1016/j.cub.2006.04.045>
- 8 Voelkel-Meiman, K., Taylor, L.F., Mukherjee, P., Humphries, N., Tsubouchi, H. and Macqueen, A.J. (2013) SUMO localizes to the central element of synaptonemal complex and is required for the full synapsis of meiotic chromosomes in budding yeast. *PLoS Genet.* **9**, e1003837 <https://doi.org/10.1371/journal.pgen.1003837>
- 9 Cahoon, C.K. and Hawley, R.S. (2016) Regulating the construction and demolition of the synaptonemal complex. *Nat. Struct. Mol. Biol.* **23**, 369–377 <https://doi.org/10.1038/nsmb.3208>
- 10 Apionishev, S., Malhotra, D., Raghavachari, S., Tanda, S. and Rasooly, R.S. (2001) The *Drosophila* UBC9 homologue lesswright mediates the disjunction of homologues in meiosis I. *Genes Cells* **6**, 215–224 <https://doi.org/10.1046/j.1365-2443.2001.00413.x>
- 11 Reichman, R., Shi, Z., Malone, R. and Smolnik, S. (2018) Mitotic and meiotic functions for the SUMOylation pathway in the *Caenorhabditis elegans* germline. *Genetics* **208**, 1421–1441 <https://doi.org/10.1534/genetics.118.300787>
- 12 Broday, L., Kolotuev, I., Didier, C., Bhoomik, A., Gupta, B.P., Sternberg, P.W. et al. (2004) The small ubiquitin-like modifier (SUMO) is required for gonadal and uterine-vulval morphogenesis in *Caenorhabditis elegans*. *Genes Dev.* **18**, 2380–2391 <https://doi.org/10.1101/gad.1227104>
- 13 Nottke, A.C., Kim, H.M. and Colaiacovo, M.P. (2017) Wrestling with chromosomes: the roles of SUMO during meiosis. *Adv. Exp. Med. Biol.* **963**, 185–196 [https://doi.org/10.1007/978-3-319-50044-7\\_11](https://doi.org/10.1007/978-3-319-50044-7_11)
- 14 Rogers, R.S., Inselman, A., Handel, M.A. and Matunis, M.J. (2004) SUMO modified proteins localize to the XY body of pachytene spermatocytes. *Chromosoma* **113**, 233–243 <https://doi.org/10.1007/s00412-004-0311-7>
- 15 Vigodner, M. and Morris, P.L. (2005) Testicular expression of small ubiquitin-related modifier-1 (SUMO-1) supports multiple roles in spermatogenesis: silencing of sex chromosomes in spermatocytes, spermatid microtubule nucleation, and nuclear reshaping. *Dev. Biol.* **282**, 480–492 <https://doi.org/10.1016/j.ydbio.2005.03.034>
- 16 Brown, P.W., Hwang, K., Schlegel, P.N. and Morris, P.L. (2008) Small ubiquitin-related modifier (SUMO)-1, SUMO-2/3 and SUMOylation are involved with centromeric heterochromatin of chromosomes 9 and 1 and proteins of the synaptonemal complex during meiosis in men. *Hum. Reprod.* **23**, 2850–2857 <https://doi.org/10.1093/humrep/den300>
- 17 Metzler-Guillemain, C., Depetris, D., Luciani, J.J., Mignon-Ravix, C., Mitchell, M.J. and Mattei, M.G. (2008) In human pachytene spermatocytes, SUMO protein is restricted to the constitutive heterochromatin. *Chromosome Res.* **16**, 761–782 <https://doi.org/10.1007/s10577-008-1225-7>
- 18 Rodriguez, A. and Pangas, S.A. (2016) Regulation of germ cell function by SUMOylation. *Cell Tissue Res.* **363**, 47–55 <https://doi.org/10.1007/s00441-015-2286-5>
- 19 La Salle, S., Sun, F., Zhang, X.D., Matunis, M.J. and Handel, M.A. (2008) Developmental control of sumoylation pathway proteins in mouse male germ cells. *Dev. Biol.* **321**, 227–237 <https://doi.org/10.1016/j.ydbio.2008.06.020>
- 20 Vigodner, M., Ishikawa, T., Schlegel, P.N. and Morris, P.L. (2006) SUMO-1, human male germ cell development, and the androgen receptor in the testis of men with normal and abnormal spermatogenesis. *Am. J. Physiol. Endocrinol. Metab.* **290**, E1022–E1033 <https://doi.org/10.1152/ajpendo.00527.2005>
- 21 Ahuja, J.S., Sandhu, R., Mainpal, R., Lawson, C., Henley, H., Hunt, P.A. et al. (2017) Control of meiotic pairing and recombination by chromosomally tethered 26S proteasome. *Science* **355**, 408–411 <https://doi.org/10.1126/science.aaf4778>
- 22 Qiao, H., Prasada Rao, H.B., Yang, Y., Fong, J.H., Cloutier, J.M., Deacon, D.C. et al. (2014) Antagonistic roles of ubiquitin ligase HEI10 and SUMO ligase RNF212 regulate meiotic recombination. *Nat. Genet.* **46**, 194–199 <https://doi.org/10.1038/ng.2858>
- 23 Rao, H.B., Qiao, H., Bhatt, S.K., Bailey, L.R., Tran, H.D., Bourne, S.L. et al. (2017) A SUMO-ubiquitin relay recruits proteasomes to chromosome axes to regulate meiotic recombination. *Science* **355**, 403–407 <https://doi.org/10.1126/science.aaf6407>
- 24 Marchiani, S., Tamburrino, L., Ricci, B., Nosi, D., Cambi, M., Piomboni, P. et al. (2014) SUMO1 in human sperm: new targets, role in motility and morphology and relationship with DNA damage. *Reproduction* **148**, 453–467 <https://doi.org/10.1530/REP-14-0173>
- 25 Xiao, Y., Pollack, D., Andrusier, M., Levy, A., Callaway, M., Nieves, E. et al. (2016) Identification of cell-specific targets of sumoylation during mouse spermatogenesis. *Reproduction* **151**, 149–166 <https://doi.org/10.1530/REP-15-0239>
- 26 Ihara, M., Stein, P. and Schultz, R.M. (2008) UBE2I (UBC9), a SUMO-conjugating enzyme, localizes to nuclear speckles and stimulates transcription in mouse oocytes. *Biol. Reprod.* **79**, 906–913 <https://doi.org/10.1095/biolreprod.108.070474>
- 27 Wang, Z.B., Ou, X.H., Tong, J.S., Li, S., Wei, L., Ouyang, Y.C. et al. (2010) The SUMO pathway functions in mouse oocyte maturation. *Cell Cycle* **9**, 2640–2646 <https://doi.org/10.4161/cc.9.13.12120>
- 28 Feitosa, W.B., Hwang, K.S. and Morris, P.L. (2018) Temporal and SUMO-specific SUMOylation contribute to the dynamics of Polo-like kinase 1 (PLK1) and spindle integrity during mouse oocyte meiosis. *Dev. Biol.* **434**, 278–291 <https://doi.org/10.1016/j.ydbio.2017.12.011>
- 29 Huang, C.J., Wu, D., Khan, F.A. and Huo, L.J. (2015) The SUMO protease SENP3 orchestrates G2-M transition and spindle assembly in mouse oocytes. *Sci. Rep.* **5**, 15600 <https://doi.org/10.1038/srep15600>
- 30 Huang, C.J.J., Wu, D., Jiao, X.F.F., Khan, F.A., Xiong, C.L.L., Liu, X.M.M. et al. (2017) Maternal SENP7 programs meiosis architecture and embryo survival in mouse. *Biochim. Biophys. Acta Mol. Cell Res.* **1864**, 1195–1206 <https://doi.org/10.1016/j.bbamcr.2017.03.005>
- 31 Pelisch, F., Tammalsu, T., Wang, B., Jaffray, E.G., Gartner, A. and Hay, R.T. (2017) A SUMO-dependent protein network regulates chromosome congression during oocyte meiosis. *Mol. Cell* **65**, 66–77 <https://doi.org/10.1016/j.molcel.2016.11.001>
- 32 Pelisch, F., Bel Borja, L., Jaffray, E.G. and Hay, R.T. (2019) Sumoylation regulates protein dynamics during meiotic chromosome segregation in *C. elegans* oocytes. *J. Cell Sci.* **132**, jcs232330 <https://doi.org/10.1242/jcs.232330>

- 33 Zhu, J.L., Lin, S.L., Li, M., Ouyang, Y.C., Hou, Y., Schatten, H. et al. (2010) Septin2 is modified by SUMOylation and required for chromosome congression in mouse oocytes. *Cell Cycle* **9**, 1607–1616 <https://doi.org/10.4161/cc.9.8.11463>
- 34 Yuan, Y.F., Zhai, R., Liu, X.M., Khan, H.A., Zhen, Y.H. and Huo, L.J. (2014) SUMO-1 plays crucial roles for spindle organization, chromosome congression, and chromosome segregation during mouse oocyte meiotic maturation. *Mol. Reprod. Dev.* **81**, 712–724 <https://doi.org/10.1002/mrd.22339>
- 35 Rodriguez, A., Briley, S.M., Patton, B.K., Tripurani, S.K., Rajapakse, K., Coarfa, C. et al. (2019) Loss of the E2 SUMO-conjugating enzyme Ube2i in oocytes during ovarian folliculogenesis causes infertility in mice. *Development* **146**, dev176701 <https://doi.org/10.1242/dev.176701>
- 36 Nacerddine, K., Lehembre, F., Bhaumik, M., Artus, J., Cohen-Tannoudji, M., Babinet, C. et al. (2005) The SUMO pathway is essential for nuclear integrity and chromosome segregation in mice. *Dev. Cell* **9**, 769–779 <https://doi.org/10.1016/j.devcel.2005.10.007>
- 37 Epps, J.L. and Tanda, S. (1998) The *Drosophila* semushi mutation blocks nuclear import of bicoid during embryogenesis. *Curr. Biol.* **8**, 1277–1280 [https://doi.org/10.1016/S0960-9822\(07\)00538-6](https://doi.org/10.1016/S0960-9822(07)00538-6)
- 38 Huang, L., Ohsako, S. and Tanda, S. (2005) The lesswright mutation activates Rel-related proteins, leading to overproduction of larval hemocytes in *Drosophila melanogaster*. *Dev. Biol.* **28**, 407–420 <https://doi.org/10.1016/j.ydbio.2005.02.006>
- 39 Nie, M., Xie, Y., Loo, J.A. and Courey, A.J. (2009) Genetic and proteomic evidence for roles of *Drosophila* SUMO in cell cycle control, Ras signaling, and early pattern formation. *PLoS ONE* **4**, e5905 <https://doi.org/10.1371/journal.pone.0005905>
- 40 Jones, D., Crowe, E., Stevens, T.A. and Candido, E.P.M. (2002) Functional and phylogenetic analysis of the ubiquitylation system in *Caenorhabditis elegans*: ubiquitin-conjugating enzymes, ubiquitin-activating enzymes, and ubiquitin-like proteins. *Genome Biol.* **3**, RESEARCH0002 <https://doi.org/10.1186/gb-2001-3-1-research0002>
- 41 Nowak, M. and Hammerschmidt, M. (2006) Ubc9 regulates mitosis and cell survival during zebrafish development. *Mol. Biol. Cell* **17**, 5324–5336 <https://doi.org/10.1091/mbc.e06-05-0413>
- 42 Wang, L., Wansleeben, C., Zhao, S., Miao, P., Paschen, W. and Yang, W. (2014) SUMO 2 is essential while SUMO 3 is dispensable for mouse embryonic development. *EMBO Rep.* **15**, 878–885 <https://doi.org/10.15252/embr.201438534>
- 43 Evdokimov, E., Sharma, P., Loskett, S.J., Lualdi, M. and Kuehn, M.R. (2008) Loss of SUMO1 in mice affects RanGAP1 localization and formation of PML nuclear bodies, but is not lethal as it can be compensated by SUMO2 or SUMO3. *J. Cell Sci.* **121**, 4106–4113 <https://doi.org/10.1242/jcs.038570>
- 44 Zhang, F.-P., Mikkonen, L., Toppari, J., Palvimäki, J.J., Thesleff, I. and Janne, O.A. (2008) Sumo-1 function is dispensable in normal mouse development. *Mol. Cell. Biol.* **28**, 5381–5390 <https://doi.org/10.1128/MCB.00651-08>
- 45 Cheng, J., Kang, X., Zhang, S. and Yeh, E.T.H. (2007) SUMO-specific protease 1 is essential for stabilization of HIF1 $\alpha$  during hypoxia. *Cell* **131**, 584–595 <https://doi.org/10.1016/j.cell.2007.08.045>
- 46 Yamaguchi, T., Sharma, P., Athanasiou, M., Kumar, A., Yamada, S. and Kuehn, M.R. (2005) Mutation of SENP1/SuPr-2 reveals an essential role for desumoylation in mouse development. *Mol. Cell. Biol.* **25**, 5171–5182 <https://doi.org/10.1128/MCB.25.12.5171-5182.2005>
- 47 Yu, L., Ji, W., Zhang, H., Renda, M.J., He, Y., Lin, S. et al. (2010) SENP1-mediated GATA1 deSUMOylation is critical for definitive erythropoiesis. *J. Cell Biol.* **207**, 1183–1195 <https://doi.org/10.1084/jem.20092215>
- 48 Chiu, S.Y., Asai, N., Costantini, F. and Hsu, W. (2008) SUMO-specific protease 2 is essential for modulating p53-mdm2 in development of trophoblast stem cell niches and lineages. *PLoS Biol.* **6**, e310 <https://doi.org/10.1371/journal.pbio.0060310>
- 49 Tahk, S., Liu, B., Chernishof, V., Wong, K.A., Wu, H. and Shuai, K. (2007) Control of specificity and magnitude of NF- $\kappa$ B and STAT1-mediated gene activation through PIASy and PIAS1 cooperation. *Proc. Natl Acad. Sci. U.S.A.* **104**, 11643–8 <https://doi.org/10.1073/pnas.0701877104>
- 50 Constanzo, J.D., Deng, M., Rindhe, S., Kij, T., Cc, Z. and Scagliione, P.P. (2016) Pias1 is essential for erythroid and vascular development in the mouse embryo. *Dev. Biol.* **415**, 98–110 <https://doi.org/10.1016/j.ydbio.2016.04.013>
- 51 Yan, Y.L., Zhang, C., Hao, J., Wang, X.L., Ming, J., Mi, L. et al. (2019) DPPA2/4 and SUMO E3 ligase PIAS4 oppositely regulate zygotic transcriptional program. *PLoS Biol.* **17**, 1–31 <https://doi.org/10.1371/journal.pbio.3000324>
- 52 Higuchi, C., Yamamoto, M., Shin, S.W., Miyamoto, K. and Matsumoto, K. (2019) Perturbation of maternal PIASy abundance disrupts zygotic genome activation and embryonic development via SUMOylation pathway. *Biol. Open* **8**, bio048652 <https://doi.org/10.1242/bio.048652>
- 53 Costa, M.W., Lee, S., Furtado, M.B., Xin, L., Sparrow, D.B., Martinez, C.G. et al. (2011) Complex SUMO-1 regulation of cardiac transcription factor NKX2-5. *PLoS ONE* **6**, e24812 <https://doi.org/10.1371/journal.pone.0024812>
- 54 Kang, X., Qi, Y., Zuo, Y., Wang, Q., Zou, Y., Schwartz, R.J. et al. (2010) SUMO-specific protease 2 is essential for suppression of polycomb group protein-mediated gene silencing during embryonic development. *Mol. Cell* **38**, 191–201 <https://doi.org/10.1016/j.molcel.2010.03.005>
- 55 Kim, E.Y., Chen, L., Ma, Y., Yu, W., Chang, J., Moskowitz, I.P. et al. (2012) Enhanced desumoylation in murine hearts by overexpressed SENP2 leads to congenital heart defects and cardiac dysfunction. *J. Mol. Cell Cardiol.* **52**, 638–649 <https://doi.org/10.1016/j.yjmcc.2011.11.011>
- 56 Kim, E.Y., Zhang, Y., Beketaev, I., Segura, A.M., Yu, W., Xi, Y. et al. (2015) SENP5, a SUMO isopeptidase, induces apoptosis and cardiomyopathy. *J. Mol. Cell. Cardiol.* **78**, 154–164 <https://doi.org/10.1016/j.yjmcc.2014.08.003>
- 57 Wang, J. and Schwartz, R.J. (2010) Sumoylation and regulation of cardiac gene expression. *Circ. Res.* **107**, 19–29 <https://doi.org/10.1161/CIRCRESAHA.110.220491>
- 58 Wang, J., Feng, X.H. and Schwartz, R.J. (2004) SUMO-1 modification activated GATA4-dependent cardiogenic gene activity. *J. Biol. Chem.* **279**, 49091–8 <https://doi.org/10.1074/jbc.M407494200>
- 59 Wang, J., Zhang, H., Iyer, D., Feng, X.H. and Schwartz, R.J. (2008) Regulation of cardiac specific nkx2.5 gene activity by small ubiquitin-like modifier. *J. Biol. Chem.* **283**, 23235–23243 <https://doi.org/10.1074/jbc.M709748200>
- 60 Nayak, A., Viale-Bouroncle, S., Morscizek, C. and Muller, S. (2014) The SUMO-specific isopeptidase SENP3 regulates MLL1/MLL2 methyltransferase complexes and controls osteogenic differentiation. *Mol. Cell* **55**, 47–58 <https://doi.org/10.1016/j.molcel.2014.05.011>
- 61 Nayak, A., Reck, A., Morscizek, C. and Müller, S. (2017) Flightless-I governs cell fate by recruiting the SUMO isopeptidase SENP3 to distinct HOX genes. *Epigenetics Chromatin* **10**, 15 <https://doi.org/10.1186/s13072-017-0122-8>
- 62 Dumontet, T., Sahut-Barnola, I., Dufour, D., Lefrançois-Martinez, A.M., Berthon, A., Montanier, N. et al. (2019) Hormonal and spatial control of SUMOylation in the human and mouse adrenal cortex. *FASEB J.* **33**, 10218–10230 <https://doi.org/10.1096/fj.201900557R>
- 63 Talamillo, A., Martin, D., Hjerpe, R., Sanchez, J. and Barrio, R. (2010) SUMO and ubiquitin modifications during steroid hormone synthesis and function. *Biochem. Soc. Trans.* **38**, 54–59 <https://doi.org/10.1042/BST0380054>



- 64 Campbell, L.A., Faivre, E.J., Show, M.D., Ingraham, J.G., Flinders, J., Gross, J.D. et al. (2008) Decreased recognition of SUMO-sensitive target genes following modification of SF-1 (NR5A1). *Mol. Cell. Biol.* **28**, 7476–7486 <https://doi.org/10.1128/MCB.00103-08>
- 65 Chen, W.Y., Lee, W.C., Hsu, N.C., Huang, F. and Chung, B.C. (2004) SUMO modification of repression domains modulates function of nuclear receptor 5A1 (steroidogenic factor-1). *J. Biol. Chem.* **279**, 38730–5 <https://doi.org/10.1074/jbc.M405006200>
- 66 Komatsu, T., Mizusaki, H., Mukai, T., Ogawa, H., Baba, D., Shirakawa, M. et al. (2004) Small ubiquitin-like modifier 1 (SUMO-1) modification of the synergy control motif of Ad4 binding protein/steroidogenic factor 1 (Ad4BP/SF-1) regulates synergistic transcription between Ad4BP/SF-1 and Sox9. *Mol. Endocrinol.* **18**, 2451–2462 <https://doi.org/10.1210/me.2004-0173>
- 67 Lee, F.Y., Faivre, E.J., Suzawa, M., Lontok, E., Ebert, D., Cai, F. et al. (2011) Eliminating SF-1 (NR5A1) sumoylation in vivo results in ectopic hedgehog signaling and disruption of endocrine development. *Dev. Cell* **21**, 315–327 <https://doi.org/10.1016/j.devcel.2011.06.028>
- 68 Xing, Y., Morohashi, K.I., Ingraham, H.A. and Hammer, G.D. (2017) Timing of adrenal regression controlled by synergistic interaction between Sf1 SUMOylation and Dax1. *Development* **144**, 3798–3807 <https://doi.org/10.1242/dev.150516>
- 69 Talamillo, A., Sánchez, J., Cantera, R., Pérez, C., Martín, D., Caminero, E. et al. (2008) Smt3 is required for *Drosophila melanogaster* metamorphosis. *Development* **135**, 1659–1668 <https://doi.org/10.1242/dev.020685>
- 70 Talamillo, A., Herboso, L., Pirone, L., Pérez, C., González, M., Sánchez, J. et al. (2013) Scavenger receptors mediate the role of SUMO and Ftz-f1 in *Drosophila* steroidogenesis. *PLoS Genet.* **9**, e1003473 <https://doi.org/10.1371/journal.pgen.1003473>
- 71 Ward, J.D., Yamamoto, K.R. and Asahina, M. (2014) SUMO as a nuclear hormone receptor effector. *Worm* **3**, e29317 <https://doi.org/10.4161/worm.29317>
- 72 Hasegawa, Y., Yoshida, D., Nakamura, Y. and Sakakibara, S.I. (2014) Spatiotemporal distribution of SUMOylation components during mouse brain development. *J. Comp. Neurol.* **522**, 3020–3036 <https://doi.org/10.1002/cne.23563>
- 73 Lioriol, C., Khayachi, A., Poupon, G., Gwizdek, C. and Martin, S. (2013) Activity-dependent regulation of the sumoylation machinery in rat hippocampal neurons. *Biol. Cell* **105**, 30–45 <https://doi.org/10.1111/boc.201200016>
- 74 Watanabe, M., Takahashi, K., Tomizawa, K., Mizusawa, H. and Takahashi, H. (2008) Developmental regulation of Ubc9 in the rat nervous system. *Acta Biochim. Pol.* **55**, 681–686 [https://doi.org/10.18388/abp.2008\\_3027](https://doi.org/10.18388/abp.2008_3027)
- 75 Fu, J., Yu, H.M.I., Chiu, S.Y., Mirando, A.J., Maruyama, E.O., Cheng, J.G. et al. (2014) Disruption of SUMO-specific protease 2 induces mitochondria mediated neurodegeneration. *PLoS Genet.* **10**, e1004579 <https://doi.org/10.1371/journal.pgen.1004579>
- 76 Juárez-Vicente, F., Luna-Pelaez, N. and García-Domínguez, M. The sumo protease Smp7 is required for proper neuronal differentiation. *Biochim. Biophys. Acta Mol. Cell Res.* 2016;**1863**:1490–1498. <https://doi.org/10.1016/j.bbamcr.2016.03.028>
- 77 Ceballos-Chávez, M., Rivero, S., García-Gutiérrez, P., Rodríguez-Paredes, M., García-Domínguez, M., Bhattacharya, S. et al. (2012) Control of neuronal differentiation by sumoylation of BRAF35, a subunit of the LSD1-CoREST histone demethylase complex. *Proc. Natl Acad. Sci. U.S.A.* **109**, 8085–8090 <https://doi.org/10.1073/pnas.1121522109>
- 78 García-Gutiérrez, P., Juárez-Vicente, F., Gallardo-Chamizo, F., Charnay, P. and García-Domínguez, M. (2011) The transcription factor Krox20 is an E3 ligase that sumoylates its Nab coregulators. *EMBO Rep.* **12**, 1018–1023 <https://doi.org/10.1038/embor.2011.152>
- 79 Estruch, S.B., Graham, S.A., Deriziotis, P. and Fisher, S.E. (2016) The language-related transcription factor FOXP2 is post-translationally modified with small ubiquitin-like modifiers. *Sci. Rep.* **6**, 20911 <https://doi.org/10.1038/srep20911>
- 80 Meredith, L.J., Wang, C.M., Nascimento, L., Liu, R., Wang, L. and Yang, W.H. (2016) The key regulator for language and speech development, FOXP2, is a novel substrate for SUMOylation. *J. Cell. Biochem.* **117**, 426–438 <https://doi.org/10.1002/jcb.25288>
- 81 Usui, N., Co, M., Harper, M., Rieger, M.A., Dougherty, J.D. and Konopka, G. (2017) Sumoylation of FOXP2 regulates motor function and vocal communication through Purkinje cell development. *Biol. Psychiatry* **81**, 220–230 <https://doi.org/10.1016/j.biopsych.2016.02.008>
- 82 Shalizi, A., Bilimoria, P.M., Stegmüller, J., Gaudillière, B., Yang, Y., Shuai, K. et al. (2007) PIASx is a MEF2 SUMO E3 ligase that promotes postsynaptic dendritic morphogenesis. *J. Neurosci.* **27**, 10037–10046 <https://doi.org/10.1523/JNEUROSCI.0361-07.2007>
- 83 Henley, J.M., Craig, T.J. and Wilkinson, K.A. (2014) Neuronal SUMOylation: mechanisms, physiology, and roles in neuronal dysfunction. *Physiol. Rev.* **94**, 1249–1285 <https://doi.org/10.1152/physrev.00008.2014>
- 84 Terada, K. and Furukawa, T. (2010) Sumoylation controls retinal progenitor proliferation by repressing cell cycle exit in *Xenopus laevis*. *Dev. Biol.* **347**, 180–194 <https://doi.org/10.1016/j.ydbio.2010.08.023>
- 85 Kanakousaki, K. and Gibson, M.C. (2012) A differential requirement for SUMOylation in proliferating and non-proliferating cells during *Drosophila* development. *Development* **139**, 2751–2762 <https://doi.org/10.1242/dev.082974>
- 86 Takanaka, Y. and Courey, A.J. (2005) SUMO enhances vestigial function during wing morphogenesis. *Mech. Dev.* **122**, 1130–1137 <https://doi.org/10.1016/j.mod.2005.05.004>
- 87 Onishi, A., Peng, G.H., Hsu, C., Alexis, U., Chen, S. and Blackshaw, S. (2009) Pias3-dependent SUMOylation directs rod photoreceptor development. *Neuron* **61**, 234–246 <https://doi.org/10.1016/j.neuron.2008.12.006>
- 88 Campa, C.K., Breit, H., Dong, L., Gumerson, J.D., Roger, J.E. and Swaroop, A. (2017) Pias3 is necessary for dorso-ventral patterning and visual response of retinal cones but is not required for rod photoreceptor differentiation. *Biol. Open* **6**, 881–890 <https://doi.org/10.1242/bio.024679>
- 89 Sánchez, J., Talamillo, A., González, M., Sánchez-Pulido, L., Jiménez, S., Pirone, L. et al. (2011) *Drosophila* Sal and Salr are transcriptional repressors. *Biochem. J.* **438**, 437–445 <https://doi.org/10.1042/BJ20110229>
- 90 Sánchez, J., Talamillo, A., Lopitz-Otsoa, F., Pérez, C., Hjerpe, R., Sutherland, J.D. et al. (2010) Sumoylation modulates the activity of spalt-like proteins during wing development in *Drosophila*. *J. Biol. Chem.* **285**, 25841–9 <https://doi.org/10.1074/jbc.M110.124024>
- 91 Liu, A. (2019) Proteostasis in the Hedgehog signaling pathway. *Semin. Cell Dev. Biol.* **93**, 153–163 <https://doi.org/10.1016/j.semcdb.2018.10.009>
- 92 Li, J., Xu, Y., Long, X.D., Wang, W., Jiao, H.K., Mei, Z. et al. (2014) Cbx4 governs HIF-1α to potentiate angiogenesis of hepatocellular carcinoma by its SUMO E3 ligase activity. *Cancer Cell* **25**, 118–131 <https://doi.org/10.1016/j.ccr.2013.12.008>
- 93 Hendriks, I.A., Lyon, D., Su, D., Skotte, N.H., Daniel, J.A., Jensen, L.J. et al. (2018) Site-specific characterization of endogenous SUMOylation across species and organs. *Nat. Commun.* **9**, 2456 <https://doi.org/10.1038/s41467-018-04957-4>
- 94 Lang, V., Da Silva-Ferrada, E., Barrio, R., Sutherland, J.D. and Rodriguez, M.S. (2016) Using biotinylated SUMO-traps to analyze SUMOylated proteins. *Methods Mol. Biol.* **1475**, 109–121 [https://doi.org/10.1007/978-1-4939-6358-4\\_8](https://doi.org/10.1007/978-1-4939-6358-4_8)
- 95 Pirone, L., Lolalpa, W., Sigursson, J.O., Ramirez, J., Pérez, C., González, M. et al. (2017) A comprehensive platform for the analysis of ubiquitin-like protein modifications using in vivo biotinylation. *Sci. Rep.* **7**, 40756 <https://doi.org/10.1038/srep40756>



- 96 Sheng, Z., Wang, X., Ma, Y., Zhang, D., Yang, Y., Zhang, P. et al. (2019) MS-based strategies for identification of protein SUMOylation modification. *Electrophoresis* **40**, 2877–2887 <https://doi.org/10.1002/elps.201900100>
- 97 Abed, M., Bitman-Lotan, E. and Orian, A. (2018) The biology of SUMO-targeted ubiquitin ligases in *Drosophila* development, immunity, and cancer. *J. Dev. Biol.* **6**, E2 <https://doi.org/10.3390/jdb6010002>
- 98 Broday, L. (2017) The SUMO system in *Caenorhabditis elegans* development. *Int. J. Dev. Biol.* **61**, 159–164 <https://doi.org/10.1387/ijdb.160388LB>
- 99 Takahashi, Y., Kahyo, T., Toh, E.A., Yasuda, H. and Kikuchi, Y. (2001) Yeast Ubl1/Siz1 is a novel SUMO1/Smt3 ligase for septin components and functions as an adaptor between conjugating enzyme and substrates. *J. Biol. Chem.* **276**, 48973–7 <https://doi.org/10.1074/jbc.M109295200>
- 100 Takahashi, Y., Yong-Gonzalez, V., Kikuchi, Y. and Strunnikov, A. (2006) Siz1/Siz2 control of chromosome transmission fidelity is mediated by the sumoylation of topoisomerase II. *Genetics* **172**, 783–794 <https://doi.org/10.1534/genetics.105.047167>
- 101 Johnson, E.S. and Gupta, A.A. (2001) An E3-like factor that promotes SUMO conjugation to the yeast septins. *Cell* **106**, 735–744 [https://doi.org/10.1016/S0092-8674\(01\)00491-3](https://doi.org/10.1016/S0092-8674(01)00491-3)
- 102 Takahashi, Y., Toh, E.A. and Kikuchi, Y. (2003) Comparative analysis of yeast PIAS-type SUMO ligases in vivo and in vitro. *J. Biochem.* **133**, 415–422 <https://doi.org/10.1093/jb/mvg054>
- 103 Serrentino, M.E., Chaplais, E., Sommermeyer, V. and Borde, V. (2013) Differential association of the conserved SUMO ligase Zip3 with meiotic double-strand break sites reveals regional variations in the outcome of meiotic recombination. *PLoS Genet.* **9**, e1003416 <https://doi.org/10.1371/journal.pgen.1003416>
- 104 Mahendrawada, L., Rai, R., Kothiwala, D. and Laloraya, S. (2017) Interplay between Top1 and Mms21/Nse2 mediated sumoylation in stable maintenance of long chromosomes. *Curr. Genet.* **63**, 627–645 <https://doi.org/10.1007/s00294-016-0665-4>
- 105 Zhao, X. and Blobel, G. (2005) A SUMO ligase is part of a nuclear multiprotein complex that affects DNA repair and chromosomal organization. *Proc. Natl Acad. Sci. U.S.A.* **102**, 4777–4782 <https://doi.org/10.1073/pnas.0500537102>
- 106 Ferreira, H.C., Towbin, B.D., Jegou, T. and Gasser, S.M. (2013) The shelterin protein POT-1 anchors *Caenorhabditis elegans* telomeres through SUN-1 at the nuclear periphery. *J. Cell Biol.* **203**, 727–735 <https://doi.org/10.1083/jcb.201307181>
- 107 Pelisch, F., Sonnevill, R., Pourkarimi, E., Agostinho, A., Blow, J.J., Gartner, A. et al. (2015) Erratum: Dynamic SUMO modification regulates mitotic chromosome assembly and cell cycle progression in *Caenorhabditis elegans*. *Nat. Commun.* **6**, 6352 <https://doi.org/10.1038/ncomms7352>
- 108 Roy Chowdhuri, S., Crum, T., Woollard, A., Aslam, S. and Okkema, P.G. (2006) The T-box factor TBX-2 and the SUMO conjugating enzyme UBC-9 are required for ABA-derived pharyngeal muscle in *C. elegans*. *Dev. Biol.* **295**, 664–677 <https://doi.org/10.1016/j.ydbio.2006.04.001>
- 109 Gutierrez, L., Zurita, M., Kennison, J.A. and Vazquez, M. (2003) The *Drosophila* trithorax group gene tonalli (tna) interacts genetically with the Brahma remodeling complex and encodes an SP-RING finger protein. *Development* **130**, 343–354 <https://doi.org/10.1242/dev.00222>
- 110 Monribot-Villanueva, J., Juarez-Urbe, R.A., Palomera-Sanchez, Z., Gutierrez-Aguilar, L., Zurita, M., Kennison, J.A. et al. (2013) Tnaa, an SP-RING protein, interacts with Osa, a subunit of the chromatin remodeling complex BRAHMA and with the SUMOylation pathway in *Drosophila melanogaster*. *PLoS ONE* **8**, e62251 <https://doi.org/10.1371/journal.pone.0062251>
- 111 Rodriguez-Magadan, H., Merino, E., Schnabel, D., Ramirez, L. and Lomeli, H. (2008) Spatial and temporal expression of Zimp7 and Zimp10 PIAS-like proteins in the developing mouse embryo. *Gene Expr. Patterns* **8**, 206–213 <https://doi.org/10.1016/j.modgep.2007.10.005>
- 112 Rosales-Vega, M., Hernandez-Becerril, A., Murillo-Maldonado, J.M., Zurita, M. and Vazquez, M. (2018) The role of the trithorax group TnaA isoforms in Hox gene expression, and in *Drosophila* late development. *PLoS ONE* **13**, e0206587 <https://doi.org/10.1371/journal.pone.0206587>
- 113 Hari, K.L., Cook, K.R. and Karpen, G.H. (2001) The *Drosophila* Su(var)2-10 locus regulates chromosome structure and function and encodes a member of the PIAS protein family. *Genes Dev.* **15**, 1334–1348 <https://doi.org/10.1101/gad.877901>
- 114 Le, H.D., Donaldson, K.M., Cook, K.R. and Karpen, G.H. (2004) A high proportion of genes involved in position effect variegation also affect chromosome inheritance. *Chromosoma* **112**, 269–276 <https://doi.org/10.1007/s00412-003-0272-2>
- 115 Mohr, S.E. and Boswell, R.E. (1999) Zimp encodes a homologue of mouse Miz1 and PIAS3 and is an essential gene in *Drosophila melanogaster*. *Gene* **229**, 109–116 [https://doi.org/10.1016/S0378-1119\(99\)00033-5](https://doi.org/10.1016/S0378-1119(99)00033-5)
- 116 Hamada, M., Haeger, A., Jeganathan, K.B., van Ree, J.H., Malureanu, L., Walde, S. et al. (2011) Ran-dependent docking of importin-beta to RanBP2/Nup358 filaments is essential for protein import and cell viability. *J. Cell Biol.* **194**, 597–612 <https://doi.org/10.1083/jcb.201102018>
- 117 Berkholz, J., Michalick, L. and Munz, B. (2014) The E3 SUMO ligase Nse2 regulates sumoylation and nuclear-to-cytoplasmic translocation of skNAC-Smyd1 in myogenesis. *J. Cell Sci.* **127**, 3794–3804 <https://doi.org/10.1242/jcs.150334>
- 118 Pungaliya, P., Kulkarni, D., Park, H.J., Marshall, H., Zheng, H., Lackland, H. et al. (2007) TOPORS functions as a SUMO-1 E3 ligase for chromatin-modifying proteins. *J. Proteome Res.* **6**, 3918–3923 <https://doi.org/10.1021/pr0703674>
- 119 Guervilly, J.H., Takedachi, A., Naim, V., Scaglione, S., Chawhan, C., Lovera, Y. et al. (2015) The SLX4 complex is a SUMO E3 ligase that impacts on replication stress outcome and genome stability. *Mol. Cell* **57**, 123–137 <https://doi.org/10.1016/j.molcel.2014.11.014>
- 120 Yamashita, D., Moriuchi, T., Osumi, T. and Hirose, F. (2016) Transcription factor hDREF is a novel SUMO E3 ligase of Mi2alpha. *J. Biol. Chem.* **291**, 11619–11634 <https://doi.org/10.1074/jbc.M115.713370>
- 121 Braschi, E., Zunino, R. and McBride, H.M. (2009) MAPL is a new mitochondrial SUMO E3 ligase that regulates mitochondrial fission. *EMBO Rep.* **10**, 748–754 <https://doi.org/10.1038/embor.2009.86>
- 122 Sharma, M., Li, X., Wang, Y., Zarnegar, M., Huang, C.Y., Palvimo, J.J. et al. (2003) Hzip10 is an androgen receptor co-activator and forms a complex with SUMO-1 at replication foci. *EMBO J.* **22**, 6101–6114 <https://doi.org/10.1093/emboj/cdg585>
- 123 Beliakoff, J., Lee, J., Ueno, H., Ayer, A., Weissman, I.L., Barsh, G.S. et al. (2008) The PIAS-like protein Zimp10 is essential for embryonic viability and proper vascular development. *Mol. Cell. Biol.* **28**, 282–292 <https://doi.org/10.1128/MCB.00771-07>
- 124 Rodriguez-Magadan, H., Ramirez, L., Schnabel, D., Vazquez, M. and Lomeli, H. (2010) Sexually dimorphic gene expression of the Zimp7 and Zimp10 genes in embryonic gonads. *Gene Expr. Patterns* **10**, 16–23 <https://doi.org/10.1016/j.gep.2009.11.004>
- 125 Chu, Y. and Yang, X. (2011) SUMO e3 ligase activity of TRIM proteins. *Oncogene* **30**, 1108–1116 <https://doi.org/10.1038/ncr.2010.462>
- 126 Ivanov, A.V., Peng, H., Yurchenko, V., Yap, K.L., Negorev, D.G., Schultz, D.C. et al. (2007) PHD domain-mediated E3 ligase activity directs intramolecular sumoylation of an adjacent bromodomain required for gene silencing. *Mol. Cell* **28**, 823–837 <https://doi.org/10.1016/j.molcel.2007.11.012>
- 127 Liang, Q., Deng, H., Li, X., Wu, X., Tang, Q., Chang, T.H. et al. (2011) Tripartite motif-containing protein 28 is a small ubiquitin-related modifier E3 ligase and negative regulator of IFN regulatory factor 7. *J. Immunol.* **187**, 4754–4763 <https://doi.org/10.4049/jimmunol.1101704>

- 128 Neo, S.H., Itahana, Y., Alagu, J., Kitagawa, M., Guo, A.K., Lee, S.H. et al. (2015) TRIM28 is an E3 ligase for ARF-mediated NPM1/B23 SUMOylation that represses centrosome amplification. *Mol. Cell. Biol.* **35**, 2851–2863 <https://doi.org/10.1128/MCB.01064-14>
- 129 Yang, Y., Fiskus, W., Yong, B., Atadja, P., Takahashi, Y., Pandita, T.K. et al. (2013) Acetylated hsp70 and KAP1-mediated Vps34 SUMOylation is required for autophagosome creation in autophagy. *Proc. Natl Acad. Sci. U.S.A.* **110**, 6841–6846 <https://doi.org/10.1073/pnas.1217692110>
- 130 Hannoun, Z., Maarifi, G. and Chelbi-Alix, M.K. (2016) The implication of SUMO in intrinsic and innate immunity. *Cytokine Growth Factor Rev.* **29**, 3–16 <https://doi.org/10.1016/j.cytogr.2016.04.003>
- 131 Li, S.J. and Hochstrasser, M. (1999) A new protease required for cell-cycle progression in yeast. *Nature* **398**, 246–251 <https://doi.org/10.1038/18457>
- 132 Nie, M. and Boddy, M.N. (2015) Pli1(PIAS1) SUMO ligase protected by the nuclear pore-associated SUMO protease Ulp1SEN1/2. *J. Biol. Chem.* **290**, 22678–22685 <https://doi.org/10.1074/jbc.M115.673038>
- 133 Kroetz, M.B., Su, D. and Hochstrasser, M. (2009) Essential role of nuclear localization for yeast Ulp2 SUMO protease function. *Mol. Biol. Cell* **20**, 2196–2206 <https://doi.org/10.1091/mbc.e08-10-1090>
- 134 Li, S.J. and Hochstrasser, M. (2000) The yeast ULP2 (SMT4) gene encodes a novel protease specific for the ubiquitin-like Smt3 protein. *Mol. Cell. Biol.* **20**, 2367–2377 <https://doi.org/10.1128/MCB.20.7.2367-2377.2000>
- 135 Davis-Roca, A.C., Divekar, N.S., Ng, R.K. and Wignall, S.M. (2018) Dynamic SUMO remodeling drives a series of critical events during the meiotic divisions in *Caenorhabditis elegans*. *PLoS Genet.* **14**, e1007626 <https://doi.org/10.1371/journal.pgen.1007626>
- 136 Tsur, A., Bening Abu-Shach, U. and Broday, L. (2015) ULP-2 SUMO protease regulates E-Cadherin recruitment to adherens junctions. *Dev. Cell* **35**, 63–77 <https://doi.org/10.1016/j.devcel.2015.08.019>
- 137 Gao, K., Li, Y., Hu, S. and Liu, Y. (2019) SUMO peptidase ULP-4 regulates mitochondrial UPR-mediated innate immunity and lifespan extension. *eLife* **8**, e41792 <https://doi.org/10.7554/eLife.41792>
- 138 Pelisch, F., Sonnevill, R., Pourkarimi, E., Agostinho, A., Blow, J.J., Gartner, A. et al. (2014) Dynamic SUMO modification regulates mitotic chromosome assembly and cell cycle progression in *Caenorhabditis elegans*. *Nat. Commun.* **5**, 5485 <https://doi.org/10.1038/ncomms6485>
- 139 Sapir, A., Tsur, A., Koorman, T., Ching, K., Mishra, P., Bardenheier, A. et al. (2014) Controlled sumoylation of the mevalonate pathway enzyme HMGs-1 regulates metabolism during aging. *Proc. Natl Acad. Sci. U.S.A.* **111**, E3880–E3889 <https://doi.org/10.1073/pnas.1414748111>
- 140 Anjum, S.G., Xu, W., Nikkholgh, N., Basu, S., Nie, Y., Thomas, M. et al. (2013) Regulation of Toll signaling and inflammation by beta-arrestin and the SUMO protease Ulp1. *Genetics* **195**, 1307–1317 <https://doi.org/10.1534/genetics.113.157859>
- 141 Berdnik, D., Favaloro, V. and Luo, L. (2012) The SUMO protease Verloren regulates dendrite and axon targeting in olfactory projection neurons. *J. Neurosci.* **32**, 8331–8340 <https://doi.org/10.1523/JNEUROSCI.6574-10.2012>
- 142 Hashiyama, K., Shigenobu, S. and Kobayashi, S. (2009) Expression of genes involved in sumoylation in the *Drosophila* germline. *Gene Expr. Patterns* **9**, 50–53 <https://doi.org/10.1016/j.gexp.2008.08.001>
- 143 Cubenas-Potts, C. and Matunis, M.J. (2013) SUMO: a multifaceted modifier of chromatin structure and function. *Dev. Cell* **24**, 1–12 <https://doi.org/10.1016/j.devcel.2012.11.020>
- 144 Sharma, P., Yamada, S., Lualdi, M., Dasso, M. and Kuehn, M.R. (2013) Senp1 is essential for desumoylating Sumo1-modified proteins but dispensable for Sumo2 and Sumo3 deconjugation in the mouse embryo. *Cell Rep.* **3**, 1640–1650 <https://doi.org/10.1016/j.celrep.2013.04.016>
- 145 Van Nguyen, T., Angkasekwinai, P., Dou, H., Lin, F.M., Lu, L.S., Cheng, J. et al. (2012) SUMO-specific protease 1 is critical for early lymphoid development through regulation of STAT5 activation. *Mol. Cell* **45**, 210–221 <https://doi.org/10.1016/j.molcel.2011.12.026>
- 146 Yates, K.E., Korb, G.A., Shtutman, M., Roninson, I.B. and DiMaio, D. (2008) Repression of the SUMO-specific protease Senp1 induces p53-dependent premature senescence in normal human fibroblasts. *Aging Cell* **7**, 609–621 <https://doi.org/10.1111/j.1474-9726.2008.00411.x>
- 147 Maruyama, E.O., Lin, H., Chiu, S.Y., Yu, H.M., Porter, G.A. and Hsu, W. (2016) Extraembryonic but not embryonic SUMO-specific protease 2 is required for heart development. *Sci. Rep.* **6**, 20999 <https://doi.org/10.1038/srep20999>
- 148 Qi, Y., Zuo, Y., Yeh, E.T. and Cheng, J. (2014) An essential role of small ubiquitin-like modifier (SUMO)-specific Protease 2 in myostatin expression and myogenesis. *J. Biol. Chem.* **289**, 3288–3293 <https://doi.org/10.1074/jbc.M113.518282>
- 149 Haindl, M., Harasim, T., Eick, D. and Muller, S. (2008) The nucleolar SUMO-specific protease SENP3 reverses SUMO modification of nucleophosmin and is required for rRNA processing. *EMBO Rep.* **9**, 273–279 <https://doi.org/10.1038/embor.2008.3>
- 150 Nayak, A., Lopez-Davila, A.J., Kefalakes, E., Holler, T., Kraft, T. and Amrute-Nayak, M. (2019) Regulation of SETD7 methyltransferase by SENP3 is crucial for sarcomere organization and cachexia. *Cell Rep.* **27**, 2725–36 e4 <https://doi.org/10.1016/j.celrep.2019.04.107>
- 151 Yun, C., Wang, Y., Mukhopadhyay, D., Backlund, P., Kolli, N., Yergey, A. et al. (2008) Nucleolar protein B23/nucleophosmin regulates the vertebrate SUMO pathway through SENP3 and SENP5 proteases. *J. Cell Biol.* **183**, 589–595 <https://doi.org/10.1083/jcb.200807185>
- 152 Zunino, R., Schauss, A., Rippstein, P., Andrade-Navarro, M. and McBride, H.M. (2007) The SUMO protease SENP5 is required to maintain mitochondrial morphology and function. *J. Cell Sci.* **120**, 1178–1188 <https://doi.org/10.1242/jcs.03418>
- 153 Li, J., Lu, D., Dou, H., Liu, H., Weaver, K., Wang, W. et al. (2018) Desumoylase SENP6 maintains osteochondroprogenitor homeostasis by suppressing the p53 pathway. *Nat. Commun.* **9**, 143 <https://doi.org/10.1038/s41467-017-02413-3>
- 154 Chen, D., Wang, P., Lewis, R.L., Daigh, C.A., Ho, C., Chen, X. et al. (2007) A microarray analysis of the emergence of embryonic definitive hematopoiesis. *Exp. Hematol.* **35**, 1344–1357 <https://doi.org/10.1016/j.exphem.2007.06.004>
- 155 Garvin, A.J., Densham, R.M., Blair-Reid, S.A., Pratt, K.M., Stone, H.R., Weekes, D. et al. (2013) The deSUMOylase SENP7 promotes chromatin relaxation for homologous recombination DNA repair. *EMBO Rep.* **14**, 975–983 <https://doi.org/10.1038/embor.2013.141>
- 156 Hutten, S., Chachami, G., Winter, U., Melchior, F. and Lamond, A.I. (2014) A role for the Cajal-body-associated SUMO isopeptidase USPL1 in snRNA transcription mediated by RNA polymerase II. *J. Cell Sci.* **127**, 1065–1078 <https://doi.org/10.1242/jcs.141788>
- 157 Matsuzaki, K., Minami, T., Tojo, M., Honda, Y., Uchimura, Y., Saitoh, H. et al. (2003) Serum response factor is modulated by the SUMO-1 conjugation system. *Biochem. Biophys. Res. Commun.* **306**, 32–38 [https://doi.org/10.1016/S0006-291X\(03\)00910-0](https://doi.org/10.1016/S0006-291X(03)00910-0)
- 158 Wang, Y., Morishima, M., Zheng, M., Uchino, T., Mannen, K., Takahashi, A. et al. (2007) Transcription factors Csx/Nkx2.5 and GATA4 distinctly regulate expression of Ca<sup>2+</sup> channels in neonatal rat heart. *J. Mol. Cell. Cardiol.* **42**, 1045–1053 <https://doi.org/10.1016/j.yjmcc.2007.03.905>
- 159 Kang, J., Gocke, C.B. and Yu, H. (2006) Phosphorylation-facilitated sumoylation of MEF2C negatively regulates its transcriptional activity. *BMC Biochem.* **7**, 5 <https://doi.org/10.1186/1471-2091-7-5>

- 160 Gocke, C.B., Yu, H. and Kang, J. (2005) Systematic identification and analysis of mammalian small ubiquitin-like modifier substrates. *J. Biol. Chem.* **280**, 5004–5012 <https://doi.org/10.1074/jbc.M411718200>
- 161 Riquelme, C., Barthel, K.K. and Liu, X. (2006) SUMO-1 modification of MEF2A regulates its transcriptional activity. *J. Cell. Mol. Med.* **10**, 132–144 <https://doi.org/10.1111/j.1582-4934.2006.tb00295.x>
- 162 Gregoire, S. and Yang, X.J. (2005) Association with class IIa histone deacetylases upregulates the sumoylation of MEF2 transcription factors. *Mol. Cell. Biol.* **25**, 2273–2287 <https://doi.org/10.1128/MCB.25.6.2273-2287.2005>
- 163 Wang, J., Li, A., Wang, Z., Feng, X., Olson, E.N. and Schwartz, R.J. (2007) Myocardin sumoylation transactivates cardiogenic genes in pluripotent 10T1/2 fibroblasts. *Mol. Cell. Biol.* **27**, 622–632 <https://doi.org/10.1128/MCB.01160-06>
- 164 Pan, M.R., Chang, T.M., Chang, H.C., Su, J.L., Wang, H.W. and Hung, W.C. (2009) Sumoylation of Prox1 controls its ability to induce VEGFR3 expression and lymphatic phenotypes in endothelial cells. *J. Cell Sci.* **122**, 3358–3364 <https://doi.org/10.1242/jcs.050005>
- 165 Shan, S.F., Wang, L.F., Zhai, J.W., Qin, Y., Ouyang, H.F., Kong, Y.Y. et al. (2008) Modulation of transcriptional corepressor activity of prospero-related homeobox protein (Prox1) by SUMO modification. *FEBS Lett.* **582**, 3723–3728 <https://doi.org/10.1016/j.febslet.2008.09.057>
- 166 Huber, P., Crum, T., Clary, L.M., Ronan, T., Packard, A.V. and Okkema, P.G. (2013) Function of the *C. elegans* T-box factor TBX-2 depends on SUMOylation. *Cell. Mol. Life Sci.* **70**, 4157–4168 <https://doi.org/10.1007/s00018-013-1336-y>
